# Supplementary material for: Screening rice genetic resources for cold tolerance at different growth stages
Source: Royal Society of Chemistry journal article supplement (doi:10.1039/c2cc31377d), 2008-01-01

# Selective Seoul-Fluor-based bioprobe, SfBP, for vaccinia H1-related phosphatase—a dual-specific protein tyrosine phosphatase

Myeong Seon Jeong,<sup>a,‡</sup> Eunha Kim,<sup>b,‡</sup> Hyo Jin Kang,<sup>a</sup> Eun Joung Choi,<sup>b</sup> Alvin R. Cho,<sup>b</sup>  
Sang J. Chung<sup>\*a</sup> and Seung Bum Park,<sup>\*b,c</sup>

<sup>a</sup>*BioNanotechnology Research Center, KRIBB and NanoBio Major, UST, 111 Kwahangno, Yuseong, Daejeon 305-806, Korea.*

<sup>b</sup>*Department of Chemistry, Seoul National University, Seoul 151-747, Korea.*

<sup>c</sup>*Department of Biophysics and Chemical Biology/BioMAX Institute, Seoul National University, Seoul 151-747, Korea. Fax: +82 2 884 4025; Tel: +82 2 880 9090*

E-mail: [sbpark@snu.ac.kr](mailto:sbpark@snu.ac.kr); [sjchung@kribb.re.kr](mailto:sjchung@kribb.re.kr)

‡ These authors equally contributed to this work

---

| S. No. | Contents                                                                                                      | Page no. |
|--------|---------------------------------------------------------------------------------------------------------------|----------|
| I      | General information                                                                                           | 2        |
| II     | Synthetic procedure and compound characterization                                                             | 3–4      |
| III    | Supporting figures and procedures for photophysical properties, enzymatic kinetics study and docking analysis | 5–15     |
| IV     | Copies of NMR spectra of all new compounds                                                                    | 16–19    |

---

## I. General information

$^1\text{H}$  and  $^{13}\text{C}$  NMR spectra were recorded on a Bruker DRX-300 (Bruker Biospin, Germany) and Varian Inova-500 (Varian Assoc., Palo Alto, USA), and chemical shifts were measured in ppm downfield from internal tetramethylsilane (TMS) standard. Multiplicity was indicated as follows: s (singlet); d (doublet); t (triplet); q (quartet); m (multiplet); dd (doublet of doublet); dt (doublet of triplet); td (triplet of doublet); br s (broad singlet), etc. Coupling constants were reported in Hz. Routine mass analyses were performed on LC/MS system equipped with a reverse phase column (C-18, 50 x 2.1 mm, 5  $\mu\text{m}$ ) and photodiode array detector using electron spray ionization (ESI) or atmospheric pressure chemical ionization (APCI). The identity of desired compounds was confirmed by high-resolution mass spectrometry (HRMS), which was conducted at the Mass Spectrometry Laboratory of Seoul National University by direct injection on a JEOL JMS AX505WA spectrometer using fast atom bombardment (FAB) method. The reaction progress was monitored using thin-layer chromatography (TLC) (silica gel 60 F<sub>254</sub> 0.25 mm), and individual components were visualized by observation under UV light (254 and 365 nm) or by treating the TLC plates with anisaldehyde,  $\text{KMnO}_4$ , and phosphomolybdic acid followed by heating. All reactions were conducted in oven-dried glassware under dry argon atmosphere, unless otherwise specified. Toluene and THF were dried by distillation from sodium-benzophenone immediately prior to use.  $\text{CH}_2\text{Cl}_2$  was distilled from  $\text{CaH}_2$  and TEA was distilled over KOH. Other solvents and organic reagents were purchased from commercial vendors and used without further purification unless otherwise mentioned. Distilled water was polished by ion exchange and filtration. UV absorbances of fluorescence compounds were measured by UV-VIS spectrophotometer (UV-1650PC, Shimadzu, Japan). Excitation and emission maxima were measured by Cary Eclipse Fluorescence spectrophotometer (Varian Assoc., Palo Alto, USA). All the photography images of the fluorescent compounds in each condition (final concentration = 67  $\mu\text{M}$ ) were taken under irradiation at 365 nm wavelengths. Reverse phase HPLC analysis was performed on a VPODS C-18 column (150 x 4.6 mm) at a flow rate of 1.0 mL/min for analysis, and PRC-ODS C-18 column (250 x 20 mm) at a flow rate of 10.0 mL/min for preparation, equipped with Shimadzu LC-6AD pump and SPD-10A detector (Japan). HPLC solvents consist of water and acetonitrile, containing 0.1% TFA.

## II. Synthetic procedure and compound characterization

General procedure for preparing compound **6** is identical to the procedure described in the previous report.<sup>1</sup> In this study, compound **7**, **8**, and SfBP were synthesized from **6**, utilizing a sequence of reactions as following.

### a. Preparation of compound **7** and SfBP.

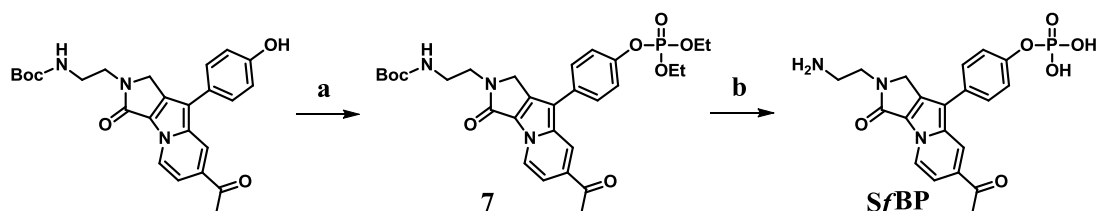

Reagents and conditions: (a) I<sub>2</sub>, DMAP, P(OEt)<sub>3</sub> / DCM; (b) TMSBr / DCM

### *tert*-Butyl 2-(7-acetyl-9-(4-(diethoxyphosphoryloxy)phenyl)-3-oxo-1*H*-pyrrolo[3,4-*b*]indolizin-2(3*H*)-yl)ethylcarbamate (**7**)

To a stirred solution of iodine (141 mg, 0.556 mmol) in DCM (1.5 mL) at 0 °C, added a triethylphosphite (114 μL, 0.666 mmol) dropwise. Then, the reaction mixture was added to a stirred solution of **6** (100 mg, 0.222 mmol) and DMAP (68 mg, 0.556 mmol) in DCM (1.5 mL) at room temperature. The resulting mixture was stirred at room temperature overnight. After completion of the reaction monitored by TLC, the reaction mixture was diluted with ddH<sub>2</sub>O and extracted with DCM 3 times. The combined organic layer was dried over anhydrous Na<sub>2</sub>SO<sub>4</sub>(s), and the filtrate was concentrated *in vacuo*. The desired compound **7** was purified by silica-gel flash column chromatography (EA:Hex = 1:3) as a yellow solid (122 mg, 0.208 mmol, yield : 93.8%). <sup>1</sup>H NMR (500 MHz, CDCl<sub>3</sub>) δ 8.55 (d, *J* = 7.5 Hz, 1H), 8.34 (s, 1H), 7.50 (d, *J* = 8.5 Hz, 2H), 7.36 (d, *J* = 8.0 Hz, 2H), 7.28 (dd, *J* = 7.5 Hz, 1.5 Hz, 1H), 4.98 (br s, 1H), 4.56 (s, 2H), 4.32–4.25 (m, 4H), 3.73 (t, *J* = 5.8 Hz, 2H), 3.47–3.43 (m, 2H), 2.61 (s, 3H), 1.41 (t, *J* = 7.2 Hz, 6H), 1.33 (s, 9H); <sup>13</sup>C NMR (125 MHz, CDCl<sub>3</sub>) δ 195.7, 162.2, 156.4, 149.9, 135.4, 134.8, 130.6, 129.6, 129.0, 124.9, 122.9, 121.2, 113.4, 109.9, 65.0, 64.9, 47.2, 43.3, 39.9, 28.5, 26.3, 16.4, 16.3; <sup>31</sup>P NMR (202 MHz, CDCl<sub>3</sub>) δ -6.91(s); LRMS (EI): *m/z* calcd for C<sub>29</sub>H<sub>36</sub>N<sub>3</sub>O<sub>8</sub>P [M+H]<sup>+</sup> 586.22, found 586.42; HRMS (FAB): *m/z* calcd for C<sub>29</sub>H<sub>36</sub>N<sub>3</sub>O<sub>8</sub>P [M]<sup>+</sup> 585.2240, found 585.2241.

<sup>1</sup> E. Kim, M. Koh, B. J. Lim, and S. B. Park, *J. Am. Chem. Soc.*, 2011, **133**, 6642–6649.

**4-(7-acetyl-2-(2-aminoethyl)-3-oxo-2,3-dihydro-1H-pyrrolo[3,4-b]indolizin-9-yl)phenyl dihydrogen phosphate (SfBP)**

A solution of compound **7** (115 mg, 0.197 mmol) in TMSBr and DCM (v:v = 1:1, 1 mL) was stirred at room temperature. After completion of the reaction, TMSBr was removed by evaporation. The resulting residue was redissolved in saturated aqueous NaHCO<sub>3</sub> solution, purified by preparative-HPLC, and subsequently freeze-dried to afford the desired compound, **SfBP**, as a yellow fluffy solid (57 mg, 0.133 mmol 67.6%). <sup>1</sup>H NMR (500 MHz, CF<sub>3</sub>CO<sub>2</sub>D) δ 8.64–8.60 (m, 2H), 7.65–7.41 (m, 5H), 4.83 (br s, 2H), 4.24 (br s, 2H), 3.78 (br s, 2H), 2.82 (br s, 3H); <sup>31</sup>P NMR (202 MHz, D<sub>2</sub>O) δ -0.75 (s); LRMS (EI): *m/z* calcd for C<sub>20</sub>H<sub>20</sub>N<sub>3</sub>O<sub>6</sub>P [M+H]<sup>+</sup> 430.11, found 430.21.

**b. Preparation of compound 8.**

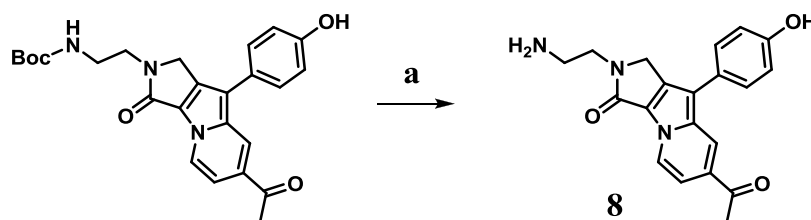

Reagents and conditions: (a) TFA:DCM (v:v = 1:1)

**7-acetyl-2-(2-aminoethyl)-9-(4-hydroxyphenyl)-1H-pyrrolo[3,4-b]indolizin-3(2H)-one (**8**)**

A solution of compound **6** (30 mg, 0.067 mmol) in TFA and DCM (v:v = 1:1) was stirred at ambient temperature. After completion of the reaction, TFA was removed by evaporation. After basification with aqueous NaHCO<sub>3</sub>(sat), crude product was purified by preparative-HPLC and subsequently freeze-dried to afford the desired compound **8** as a yellow solid (27 mg, 0.058 mmol, yield : 87.2%) <sup>1</sup>H NMR (500 MHz, DMSO-*d*<sub>6</sub>) 9.71 (br s, 1H), 8.50 (d, *J* = 7.0 Hz, 1H), 8.40 (s, 1H), 7.89 (br s, 3H), 7.51 (d, *J* = 8.5 Hz, 2H), 7.27 (d, *J* = 7.0 Hz, 1H), 6.94 (d, *J* = 8.5 Hz, 2H), 4.68 (s, 2H), 3.77 (br s, 2H), 3.14 (br s, 2H), 2.63 (s, 3H); <sup>13</sup>C NMR (75 MHz, DMSO-*d*<sub>6</sub>) 195.7, 161.1, 158.0 (q, *J*<sub>C,F</sub> = 30.6 Hz), 156.6, 135.1, 133.1, 128.6, 128.3, 124.1, 123.8, 122.0, 121.6, 116.2, 113.6, 109.3, 45.4, 37.8, 26.2; LRMS (EI): *m/z* calcd for C<sub>20</sub>H<sub>20</sub>N<sub>3</sub>O<sub>3</sub> [M+H]<sup>+</sup> 350.15, found 350.07; HRMS (FAB): *m/z* calcd for C<sub>20</sub>H<sub>20</sub>N<sub>3</sub>O<sub>3</sub> [M+H]<sup>+</sup> 350.1511, found 350.1505.

### III. Supporting figures and procedures for photophysical properties, enzymatic kinetics study and docking analysis.

A.

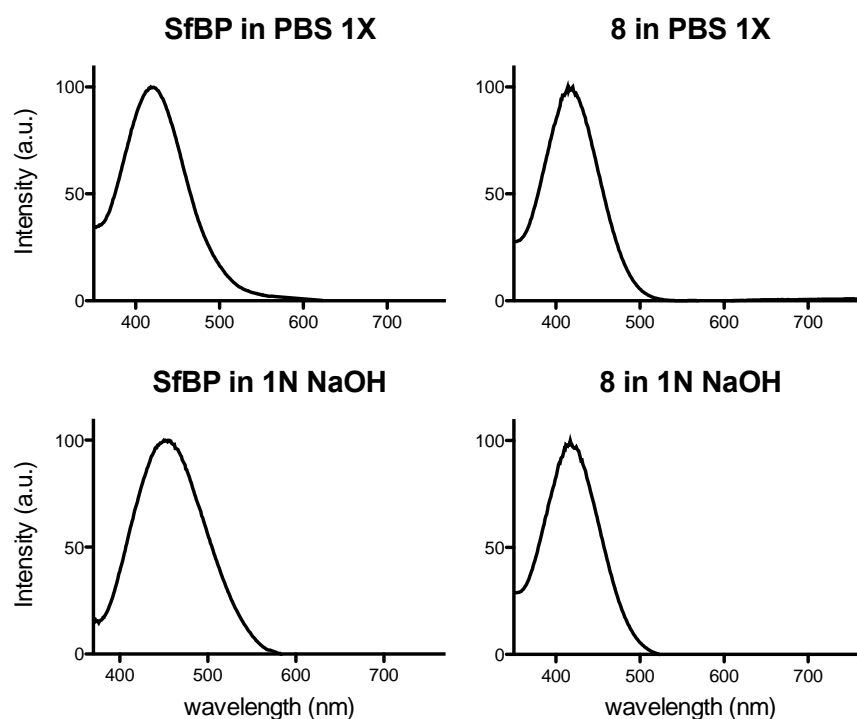

B.

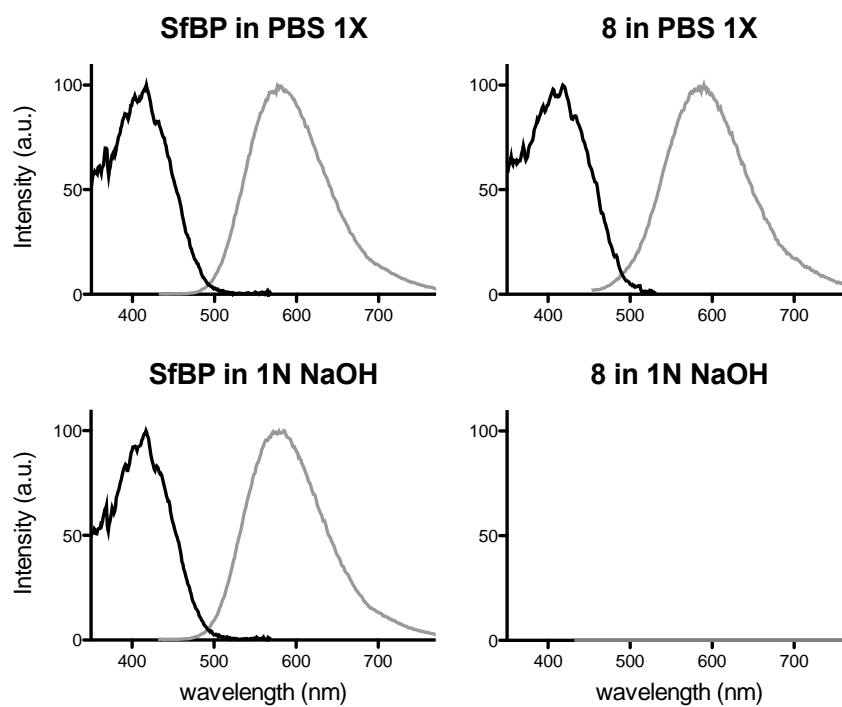

**Fig. S1.** The normalized absorption (A) spectra and excitation (black) & emission (grey) spectra (B) of SfBP and 8.

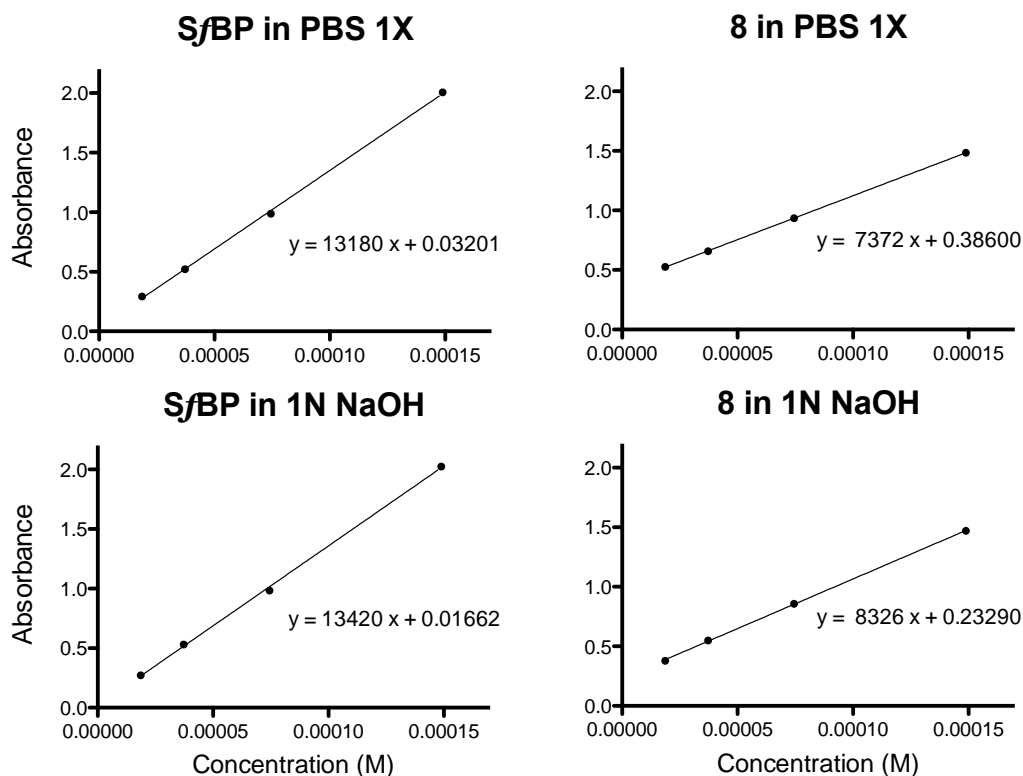

**Fig. S2.** Calculation of the molar extinction coefficient ( $\epsilon$ ) for SfBP (left) and **8** (right) in PBS 1X (up) and 1N NaOH (down) solution at the absorption maximum in each condition.

### Absolute quantum yield measurement

Absolute quantum yield was measured with QE-1000, Otsuka Electronics Co., LTD, Japan. Absolute quantum yields of known fluorescent dyes in various wavelengths were measured to confirm the reliability of the measurement system. [Anthracene: 0.275 (reported: 0.27)<sup>2</sup> in EtOH; fluorescein: 0.831 (reported: 0.79)<sup>3</sup> in 1N NaOH solution; rhodamine 6G: 0.933 (reported: 0.95)<sup>4</sup> in EtOH]

<sup>2</sup> W. H. Melhuish, *J. Phys. Chem.*, 1961, 65, 229–235.

<sup>3</sup> J. Q. Umberger, V. K. LaMer, *J. Am. Chem. Soc.*, 1945, 67, 1099–1109.

<sup>4</sup> R. F. Kubin and A. N. Fletcher, *J. Luminescence*, 1982, 27, 455–462.

### Purification of recombinant PTPs

Human PTP genes were amplified by PCR using appropriate primers and corresponding cDNAs as templates. The PCR products were digested with *NdeI* and *BamHI* or *NdeI* and *XhoI*, and subcloned into *NdeI-BamHI* or *NdeI-XhoI* digested *pET* 28a(+) vector (Novagen). The resulting *N*-terminal MBP, *C*-terminal-His<sub>6</sub>-tagged human PTPs were transformed into *E. coli* Rosetta (DE3) (Novagen). Expression of the recombinant human PTPs was induced by adding 1 mM isopropyl-1-thio- $\beta$ -D-galactoside (IPTG) at 291 K for 16 h. Cells were harvested by centrifugation (3,570g, at 4 °C for 10 min), washed with buffer A (50 mM Tris pH 7.5, 250 mM NaCl, 5% glycerol, and 0.025%  $\beta$ -mercaptoethanol), and lysed by ultrasonication. After centrifugation (29,820g for 30 min), the supernatant was incubated with a cobalt affinity resin (TALON<sup>®</sup>, Clontech) on a rocker at 4 °C for 1 h, and then resin was washed with buffer A containing 10 mM imidazole. PTPs were eluted with buffer A containing 100 mM imidazole, concentrated to 2 mg/mL, and stored at -70 °C. PTPs tested in this study were listed in **Fig. S3**.

|    | Classical PTPs |        |        | Dual specific PTPs |         |        |       |
|----|----------------|--------|--------|--------------------|---------|--------|-------|
|    | A              | B      | C      | D                  | E       | F      | G     |
| 1  | PTPRA          | PTPRN2 | PTPN6  | DUSP1              | DUSP11  | DUSP25 | TENC1 |
| 2  | PTPRC          | PTPRR  | PTPN7  | DUSP3              | DUSP12  | DUSP26 | MTMR1 |
| 3  | PTPRE          | PTPRS  | PTPN11 | DUSP4              | DUSP13B | EPM2A  | MTMR3 |
| 4  | PTPRF          | PTPRT  | PTPN12 | DUSP5              | DUSP14  | SSH1   | MTMR7 |
| 5  | PTPRG          | PTPRU  | PTPN13 | DUSP7              | DUSP18  | SSH2   | MTMR8 |
| 6  | PTPRJ          | PTPRZ  | PTPN14 | DUSP8              | DUSP19  | PTP4A1 | MBP   |
| 7  | PTPRK          | PTPN1  | PTPN18 | DUSP9              | DUSP21  | PTP4A2 |       |
| 8  | PTPRM          | PTPN2  | PTPN21 | DUSP10             | DUSP22  | PTP4A3 |       |
| 9  | PTPRN          | PTPN3  | PTPN22 | DUSP16             | DUSP23  | CDC14B |       |
| 10 | PTPRO          | PTPN5  | PTPN23 | MK-STYX            | DUSP24  | TPE    |       |

**Fig. S3.** PTPs used in this study. Class I human PTPs, consisting of 30 classical PTPs and 35 dual specific PTPs, were tested for S<sub>2</sub>/BP catalysis.

### **Measurement of enzymatic activities of cloned PTPs with DiFMUP at pH 8.0**

The enzymatic reactions were started by addition of each PTP (1  $\mu$ M) to a solution of DiFMUP (100  $\mu$ M) in 100  $\mu$ L of reaction buffer (20 mM Tris, pH 8.0, 150 mM NaCl, 0.01% Triton X-100, 5 mM DTT, 5  $\mu$ M BSA) on a 96 well-plate. Reaction mixtures were incubated at 25 °C for 10 min. The fluorescence intensities were measured at Ex/Em = 355/460 nm on a Wallac Victor Microplate Reader (Fig. S4).

### **Fluorescence assay of SfBP hydrolysis by various PTPs at pH 8.0**

The enzymatic reactions were started by addition of each PTP (1  $\mu$ M) to a solution of SfBP (100  $\mu$ M) in the reaction buffer (100  $\mu$ L, 20 mM Tris, pH 8.0, 150 mM NaCl, 0.01% Triton X-100, 5 mM DTT, 5  $\mu$ M BSA) on a 96 well-plate. Reaction mixtures were incubated at 25 °C for 30 min and followed by addition of 2 N NaOH (100  $\mu$ L). The fluorescence intensities were measured at Ex/Em = 405/570 nm on a Wallac Victor Microplate Reader (Fig. S4). In addition, the three DUSPs (DUSP3, DUSP13B, DUSP14), which showed meaningful activity for SfBP in the primary screening, were tested for SfBP hydrolysis at the same conditions described above except that the enzymes (100 nM) were used (Fig. 3).



**DiFMUP**

|    | Classical PTPs |    |     | Dual Specific PTPs |    |    |    | Activity (%) |
|----|----------------|----|-----|--------------------|----|----|----|--------------|
|    | A              | B  | C   | D                  | E  | F  | G  |              |
| 1  | 75             | 0  | 74  | 3                  | 1  | 14 | 1  | 76-100       |
| 2  | 71             | 98 | 100 | 45                 | 1  | 3  | 69 | 51-75        |
| 3  | 2              | 98 | 80  | 4                  | 1  | 95 | 1  | 26-50        |
| 4  | 97             | 57 | 63  | 1                  | 24 | 11 | 1  | 0-25         |
| 5  | 97             | 3  | 88  | 8                  | 41 | 1  | 4  |              |
| 6  | 95             | 0  | 6   | 25                 | 4  | 1  | 0  |              |
| 7  | 1              | 96 | 97  | 12                 | 22 | 1  |    |              |
| 8  | 90             | 59 | 66  | 1                  | 8  | 1  |    |              |
| 9  | 2              | 95 | 96  | 1                  | 1  | 96 |    |              |
| 10 | 91             | 1  | 1   | 0                  | 1  | 0  |    |              |

**SfBP**

|    | Classical PTPs |    |    | Dual Specific PTPs |    |    |    |
|----|----------------|----|----|--------------------|----|----|----|
|    | A              | B  | C  | D                  | E  | F  | G  |
| 1  | 8              | 4  | 5  | 6                  | 16 | 0  | 9  |
| 2  | 10             | 13 | 10 | 100                | 14 | 9  | 9  |
| 3  | 11             | 8  | 11 | 11                 | 53 | 12 | 13 |
| 4  | 18             | 8  | 11 | 1                  | 52 | 10 | 11 |
| 5  | 8              | 10 | 8  | 10                 | 8  | 12 | 9  |
| 6  | 12             | 7  | 10 | 17                 | 18 | 12 | 0  |
| 7  | 9              | 10 | 8  | 24                 | 10 | 13 |    |
| 8  | 10             | 9  | 7  | 5                  | 10 | 9  |    |
| 9  | 11             | 10 | 10 | 8                  | 8  | 12 |    |
| 10 | 22             | 4  | 14 | 6                  | 7  | 19 |    |

**Fig. S4.** Normalized percentage activity of DiFMUP and SfBP for 65 class I human PTPs. The data were normalized as percentage activity relative to that of the PTP with highest activity: PTPRC for DiFMUP, and VHR (DUSP3) for SfBP, respectively.

### **Measurement of enzymatic activities of cloned DUSPs for DiFMUP hydrolysis at pH 6.0**

Since most DUSPs show the optimal catalytic activity the catalytic activity of DUSPs for DiFMUP was tested at pH 6. The enzymatic reaction mixtures were prepared by the addition of each PTP (10 nM or 100 nM) to aqueous solution of DiFMUP (100  $\mu$ M) in 100 mM Bis-Tris pH 6.0 reaction buffer with 1 mM dithiothreitol (DTT) present.<sup>5</sup> Reaction mixtures were incubated at 25 °C for 10 min and the fluorescence intensities were measured at Em/Ex = 355/460 nm on a 96-well plate using Wallac Victor Microplate Reader (Fig. S5A).

### **Fluorescence assay of SfBP hydrolysis with various DUSPs at pH 6.0**

Since most DUSPs show the optimal catalytic activity the catalytic activity of DUSPs for SfBP was tested at pH 6. The enzymatic reaction mixtures were prepared by the addition of each PTP (10 nM or 100 nM) to aqueous solution of SfBP (100  $\mu$ M) in 100 mM Bis-Tris pH 6.0 reaction buffer with 1 mM dithiothreitol (DTT) present.<sup>5</sup> Reaction mixtures were incubated at 25 °C for 30 min and followed by addition of 2 N NaOH solution to mixture solutions. The fluorescence intensities were measured at Ex/Em = 405/570 nm on a 96-well plate using a Wallac Victor Microplate Reader (Fig. S6).

---

<sup>5</sup> S. Wu, S. Vossius, S. Rahmouni, A. V. Miletic, T. Vang, J. Vazquez-Rodriguez, F. Cerignoli, Y. Arimura, S. Williams, T. Hayes, M. Moutschen, S. Vasile, M. Pellicchia, T. Mustelin, L. Tautz, *J. Med. Chem.*, 2009, **52**, 6716–6723.

A. DiFMUP hydrolysis at pH 6 by 100 nM DUSPs

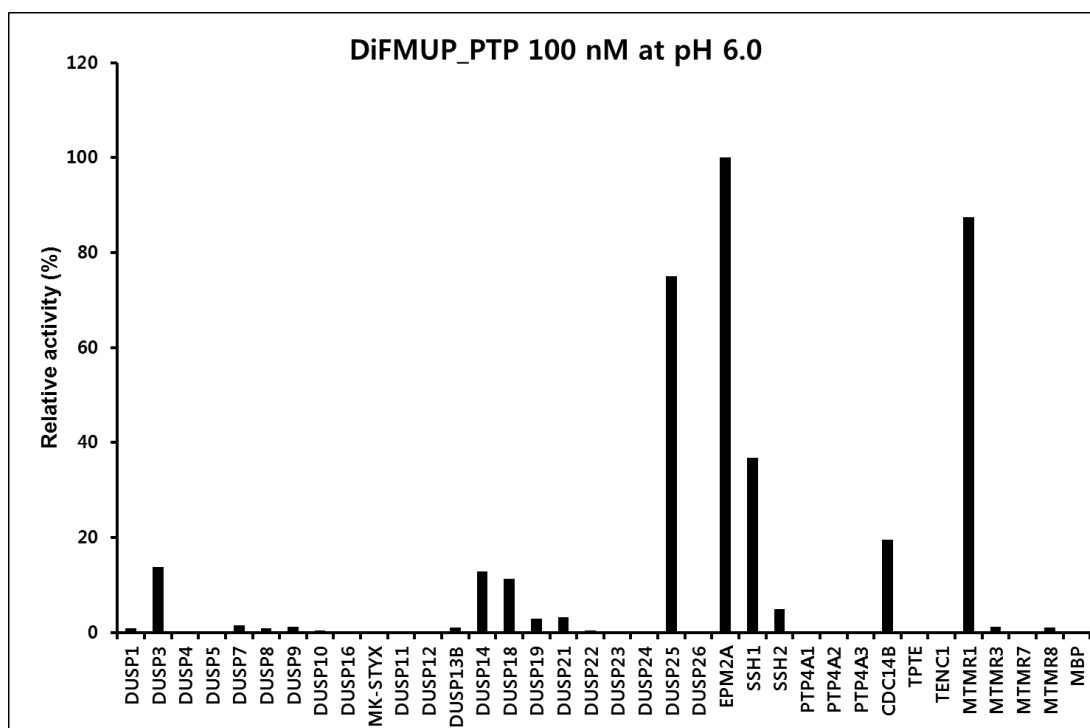

B. DiFMUP hydrolysis at pH 6 by 10 nM DUSPs

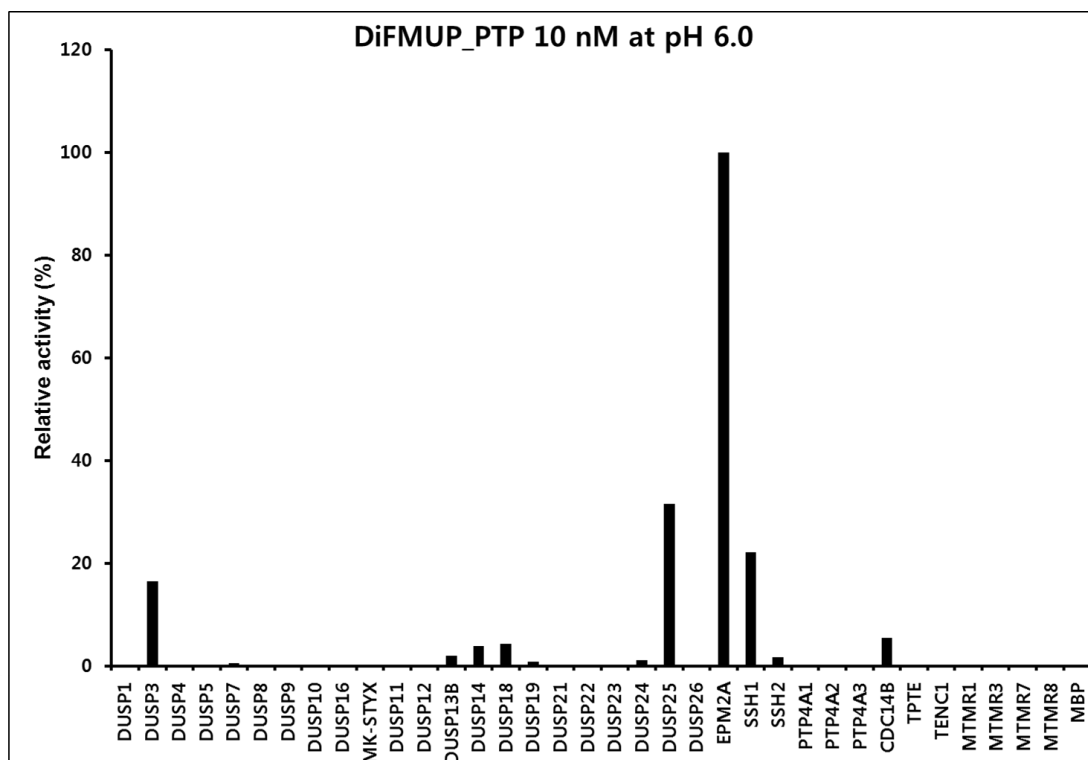

**Fig. S5.** Normalized percentage activity of DiFMUP hydrolysis at pH 6.0 by 100 nM (A) and 10 nM (B) of 35 DUSPs, respectively. The data were normalized as percentage activity relative to that of EPM2A.

S12 | SUPPORTING INFORMATION

A. S<sub>f</sub>BP hydrolysis by 100 nM DUSPs.

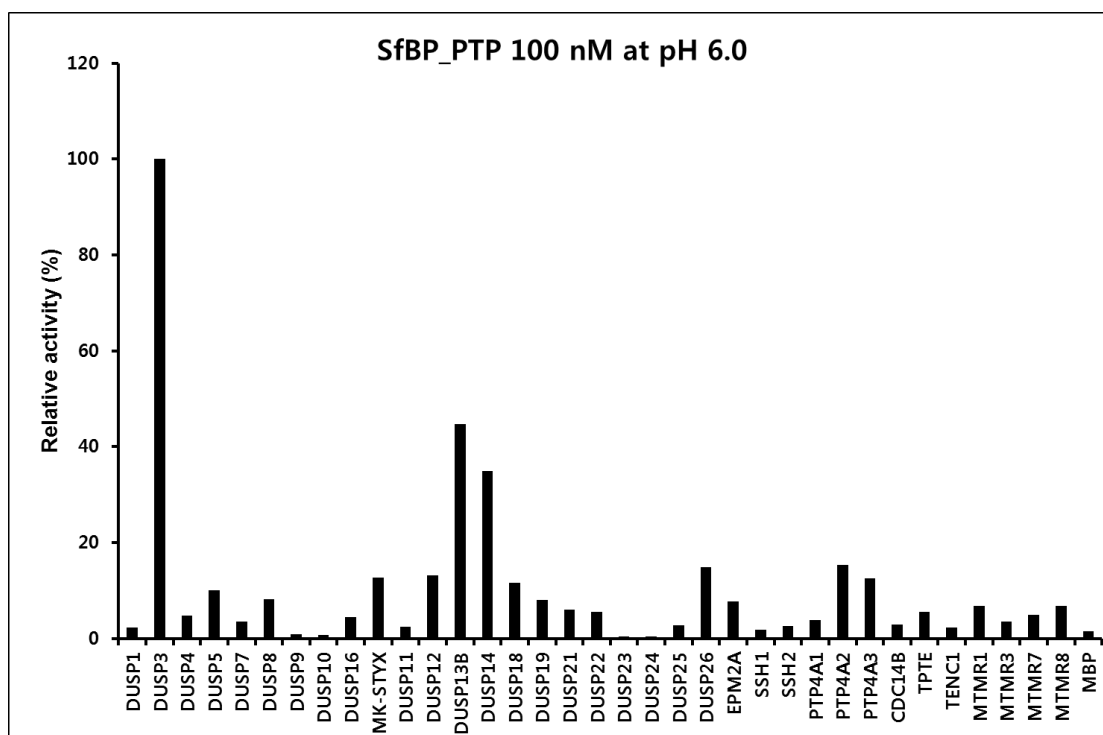

B. S<sub>f</sub>BP hydrolysis by 10 nM DUSPs.

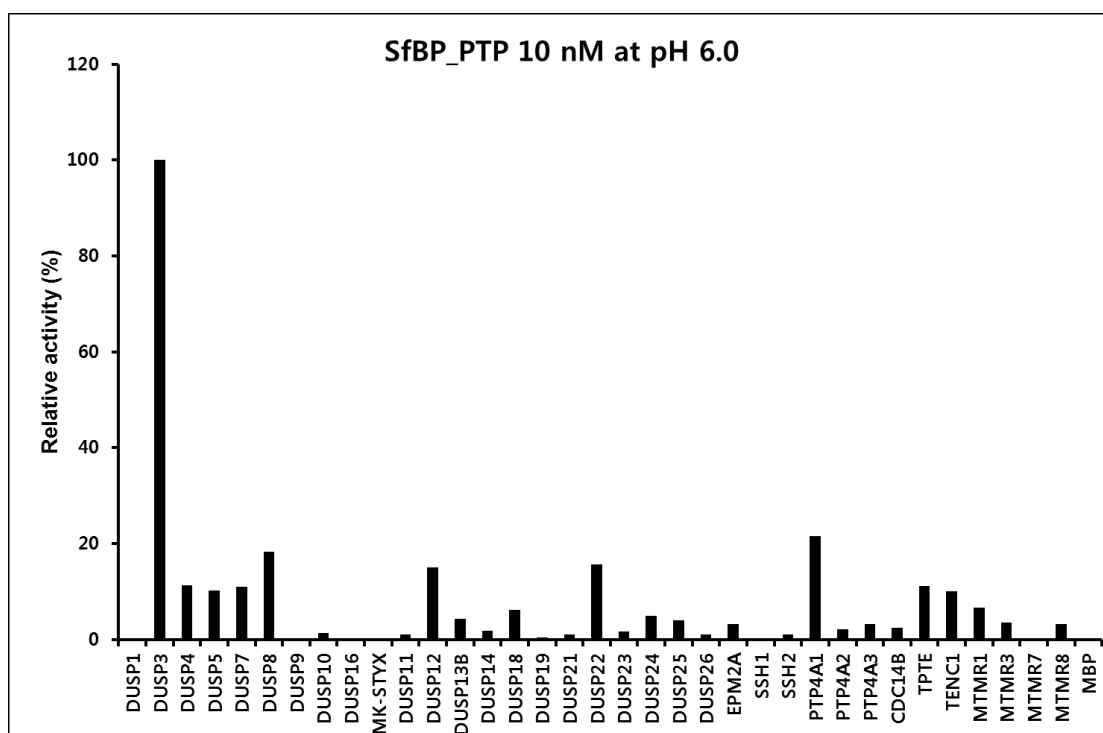

**Fig. S6.** Normalized percentage activity of S<sub>f</sub>BP hydrolysis at pH 6.0 by 100 nM (A) and 10 nM (B) of 35 DUSPs, respectively. The data were normalized as percentage activity relative to that of VHR (DUSP3). When 10 nM of DUSPs were tested, only DUSP3 showed the strong activity for S<sub>f</sub>BP catalysis.

### Determination of kinetic constants for S<sub>f</sub>BP hydrolysis at pH 8.0 by DUSP3

To determine the kinetic constants, S<sub>f</sub>BP at a series of the final concentrations (12.5–200 μM) was hydrolyzed by DUSP3 (1 μM). The reaction (100 μL), in the reaction buffer (20 mM Tris, pH 8.0, 150 mM NaCl, 0.01% Triton X-100, 5 mM DTT, 5 μM BSA), was aliquated and quenched by adding 2 N NaOH (100 μL) in a 5 min interval over 30 min, and measured fluorescence intensity at Ex/Em = 405/570 nm at 25 °C. The initial velocity was calculated from the slope of the each progress curve (Fig. S7 (left)). The parameters such as  $K_m$  and  $k_{cat}$  for S<sub>f</sub>BP catalysis by DUSP3 were determined by Lineweaver-Burk plot. Fig. S7 (right) showed the mean value of the relative initial velocity of S<sub>f</sub>BP hydrolysis by DUSP3.  $K_m$ ,  $k_{cat}$ , and  $k_{cat}/K_m$  values for S<sub>f</sub>BP catalysis by DUSP3 were determined to be 100.8 μM, 2.45 min<sup>-1</sup>, and 0.02 μM<sup>-1</sup>·min<sup>-1</sup>, respectively.

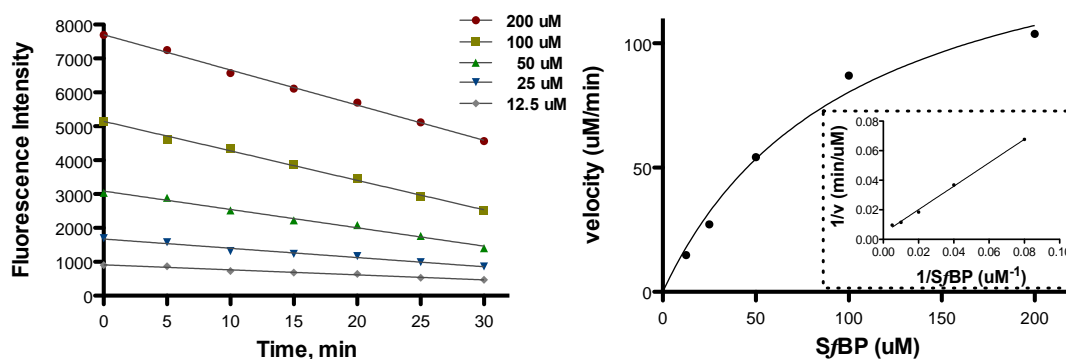

**Fig. S7.** Catalytic hydrolysis of S<sub>f</sub>BP by DUSP3. Progress curves of S<sub>f</sub>BP hydrolysis at a series of concentrations (left) and Michaelis-Menten curve of S<sub>f</sub>BP by DUSP3 (right). The insert represents Lineweaver-Burk plot.

### Determination of kinetic constants for DiFMUP at pH 8.0

To determine the kinetic constants, DiFMUP at a series of the final concentrations (25–800 μM) was hydrolyzed by DUSP3 (0.1 μM). The reaction (100 μL), in the reaction buffer (20 mM Tris, pH 8.0, 150 mM NaCl, 0.01% Triton X-100, 5 mM DTT, 5 μM BSA) in a 1 min interval over 10 min, and measured fluorescence intensity at

Ex/Em = 355/460 nm at 25 °C. The initial velocity was calculated from the slope of the each progress curve. The parameters such as  $K_m$  and  $k_{cat}$  for DiFMUP catalysis by DUSP3 were determined by Lineweaver-Burk plot.  $K_m$ ,  $k_{cat}$ , and  $k_{cat}/K_m$  values for SfBP catalysis by DUSP3 were determined to be 199.6  $\mu\text{M}$ , 7.43  $\text{min}^{-1}$ , and 0.37  $\mu\text{M}^{-1}\cdot\text{min}^{-1}$ , respectively.

#### **Determination of kinetic constants for SfBP at pH 6.0**

To determine the kinetic constants at pH 6.0, SfBP and DiFMUP at a series of the final concentrations (SfBP: 6.25–200  $\mu\text{M}$ , DiFMUP: 6.25–800  $\mu\text{M}$ ) were hydrolyzed by VHR (DUSP3), DUSP14, and DUSP13B. The reactions (100  $\mu\text{L}$ ) with SfBP, in the reaction buffer (20 mM Bis-Tris, pH 6.0, 150 mM NaCl, 0.01% Triton X-100, 5 mM DTT, 5  $\mu\text{M}$  BSA), were aliquoted and quenched by adding 2 N NaOH (100  $\mu\text{L}$ ) in a 5 min interval over 30 min, and measured fluorescence intensity at Ex/Em = 405/570 nm at 25 °C. Another reactions (100  $\mu\text{L}$ ) with DiFMUP, in the reaction buffer (20 mM Bis-Tris, pH 6.0, 150 mM NaCl, 0.01% Triton X-100, 5 mM DTT, 5  $\mu\text{M}$  BSA) were measured fluorescence intensity at Ex/Em = 355/460 nm at 25 °C in a 1 min interval over 10 min. The initial velocity was calculated from the slope of the each progress curve. The parameters such as  $K_m$  and  $k_{cat}$  for SfBP and DiFMUP catalysis by VHR (DUSP3), DUSP14 and DUSP13B were determined by Lineweaver-Burk plot. Kinetic constants ( $K_m$ ,  $k_{cat}$ , and  $k_{cat}/K_m$  values) for SfBP and DiFMUP hydrolysis by three DUSPs were listed in Table. 2.

## Docking analysis

All possible conformers of SfBP were virtually generated with Vconf Interface program of Verachem, LLC. All generated conformers were analyzed with computer-aided docking simulation, which was performed by the Discovery Studio 1.7<sup>®</sup> program. The detailed docking calculation was performed using LigandFit module implemented in the Receptor-Ligand Interaction protocol. We utilized the crystal structure of PTP1B (PDB ID: 2NT7) and DUSP3 (PDB ID: 1VHR) for our docking simulation. The binding sites for SfBP were defined from their receptor cavities.

A.

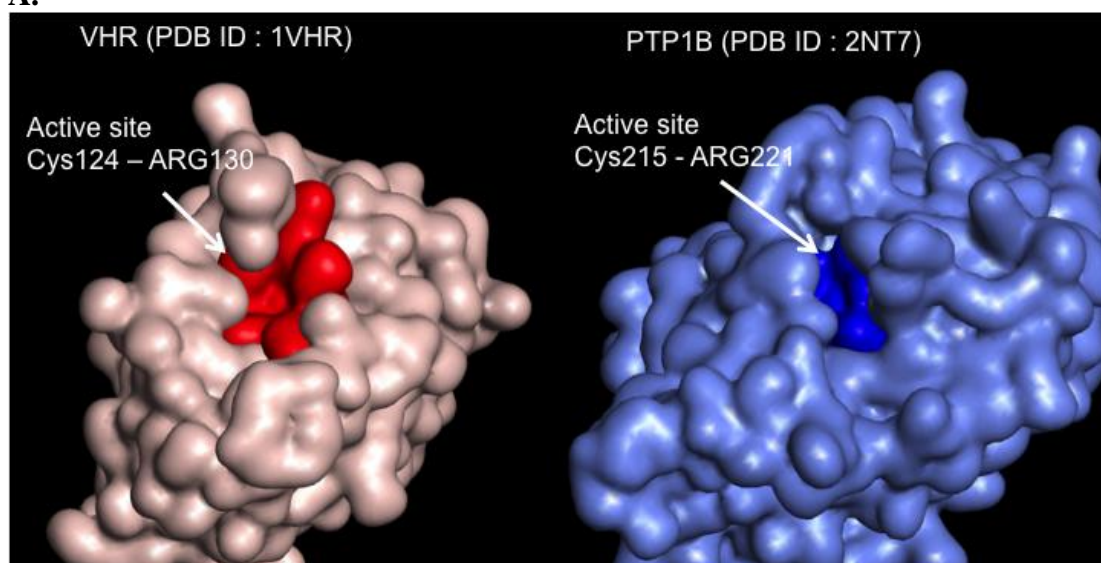

B.

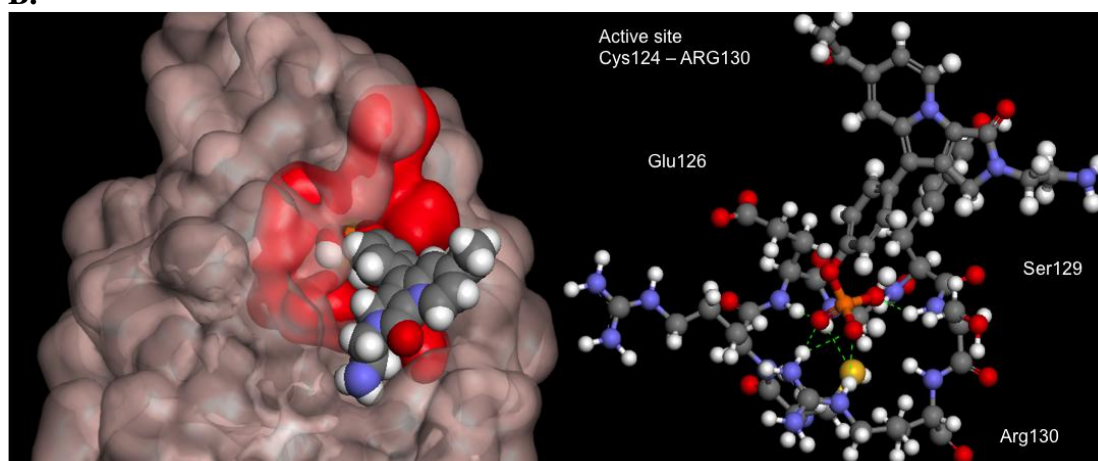

**Fig. S8.** *In silico* docking analysis. A) Crystal structures of VHR and PTP1B. Active sites (Cys124–Arg130 for VHR and Cys215–Arg221 for PTP1B) were highlighted in red and blue (for VHR and PTP1B, respectively). B) The docking mode of SfBP at the active site of VHR and its specific interaction are presented. Phosphate group of SfBP potentially involves 3 hydrogen bonding interactions with Glu126, Ser129 and Arg130 in active site. We failed to identify the meaning docking of SfBP with PTP1B.

#### IV. Copies of NMR spectra of all new compounds

##### *tert*-Butyl 2-(7-acetyl-9-(4-(diethoxyphosphoryloxy)phenyl)-3-oxo-1*H*-pyrrolo[3,4-*b*]indolizin-2(3*H*)-yl)ethylcarbamate

<sup>1</sup>H NMR (CDCl<sub>3</sub>)

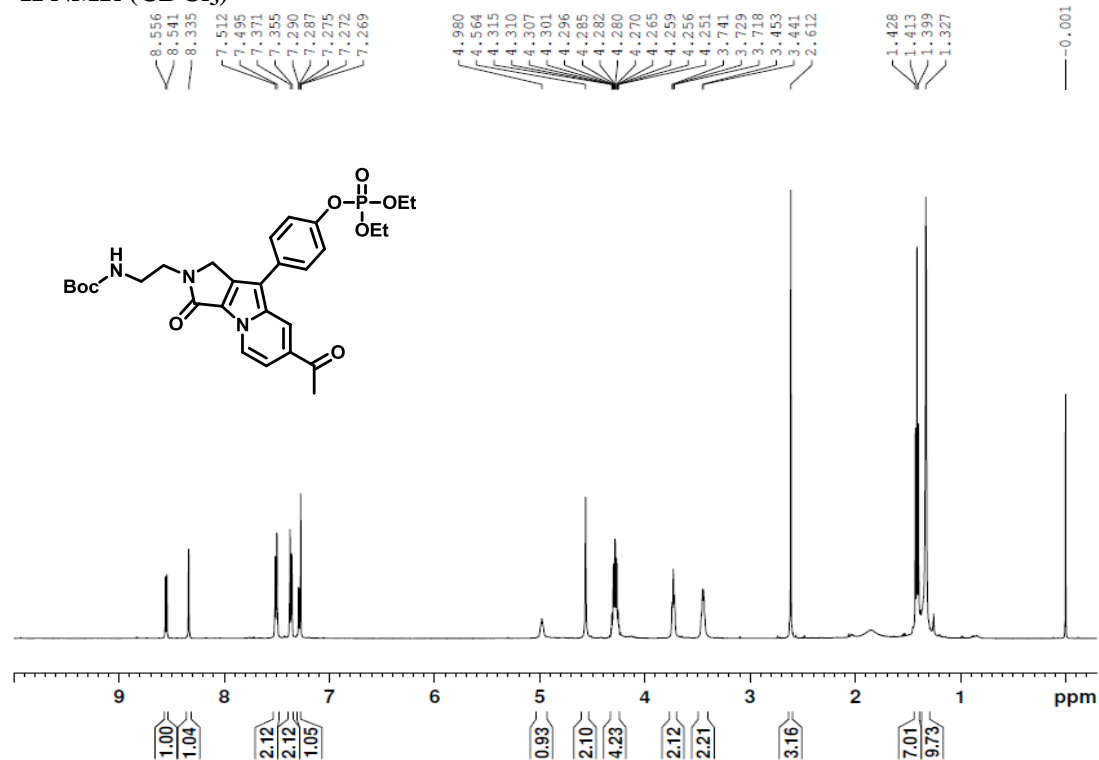

<sup>13</sup>C NMR (CDCl<sub>3</sub>)

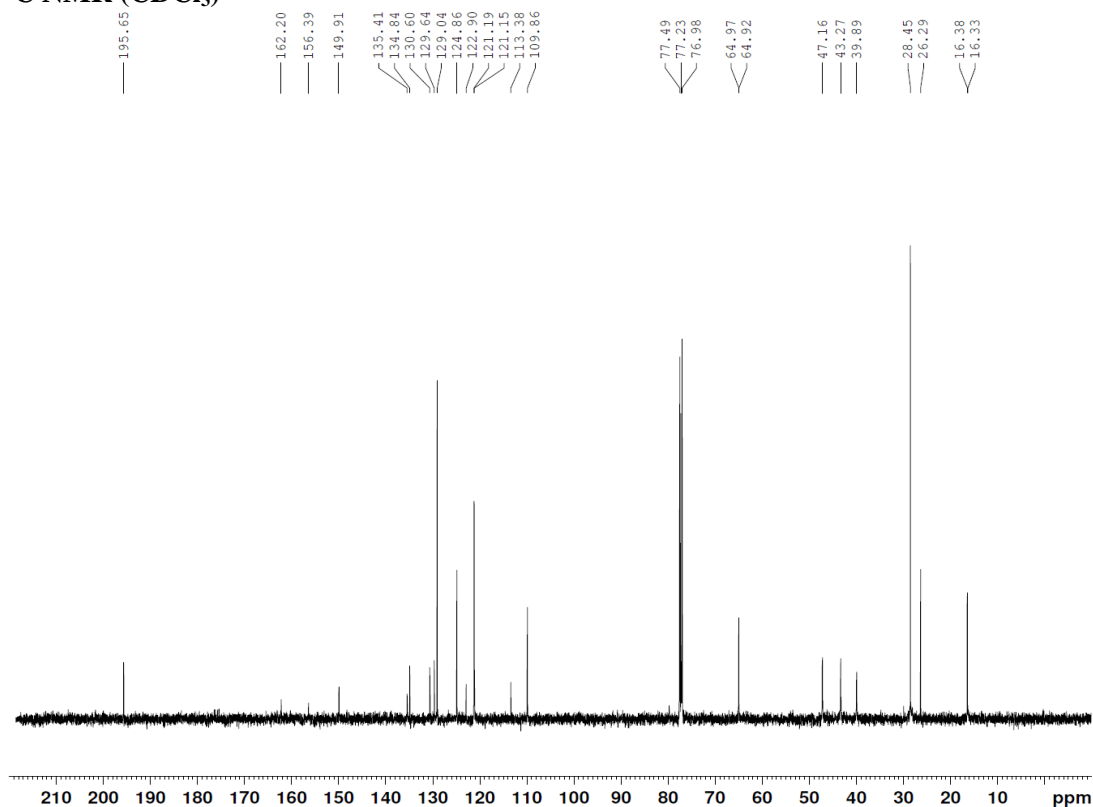



$^{31}\text{P}$  NMR ( $\text{CDCl}_3$ )

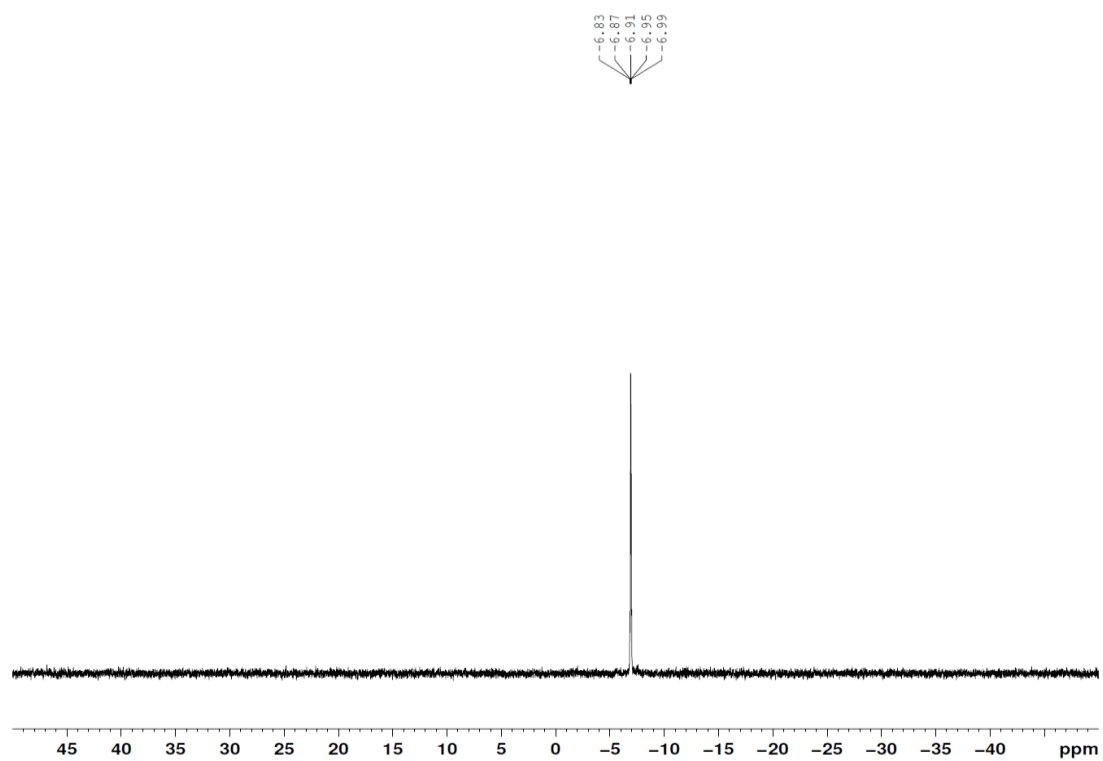

4-(7-Acetyl-2-(2-aminoethyl)-3-oxo-2,3-dihydro-1H-pyrrolo[3,4-b]indolizin-9-yl)phenyl dihydrogen phosphate

$^1\text{H}$  NMR ( $\text{CF}_3\text{CO}_2\text{D}$ )

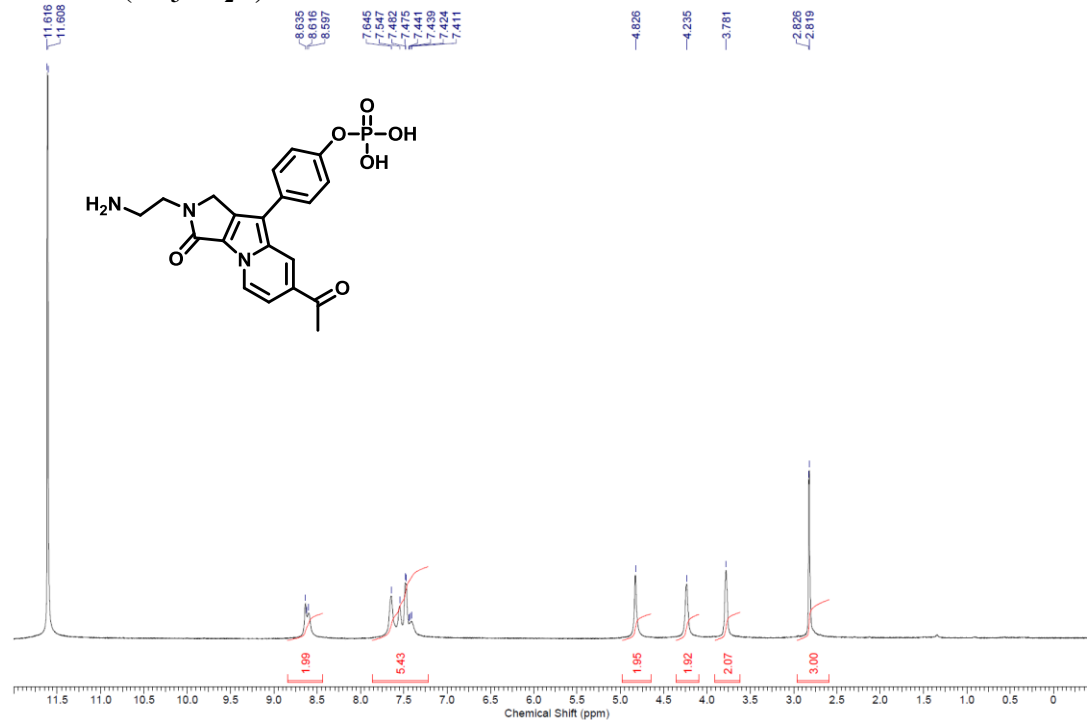

$^{31}\text{P}$  NMR ( $\text{D}_2\text{O}$ )

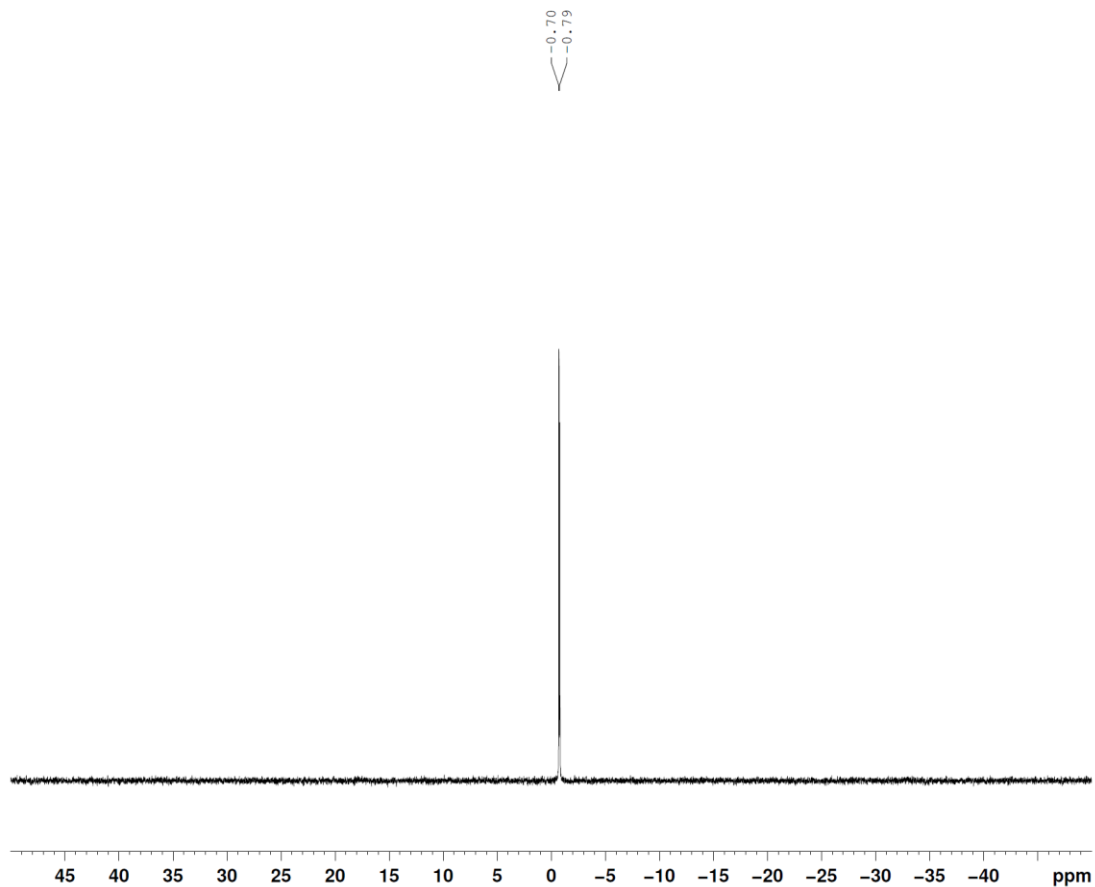

### 7-Acetyl-2-(2-aminoethyl)-9-(4-hydroxyphenyl)-1*H*-pyrrolo[3,4-*b*]indolizin-3(2*H*)-one

<sup>1</sup>H NMR (CDCl<sub>3</sub>)

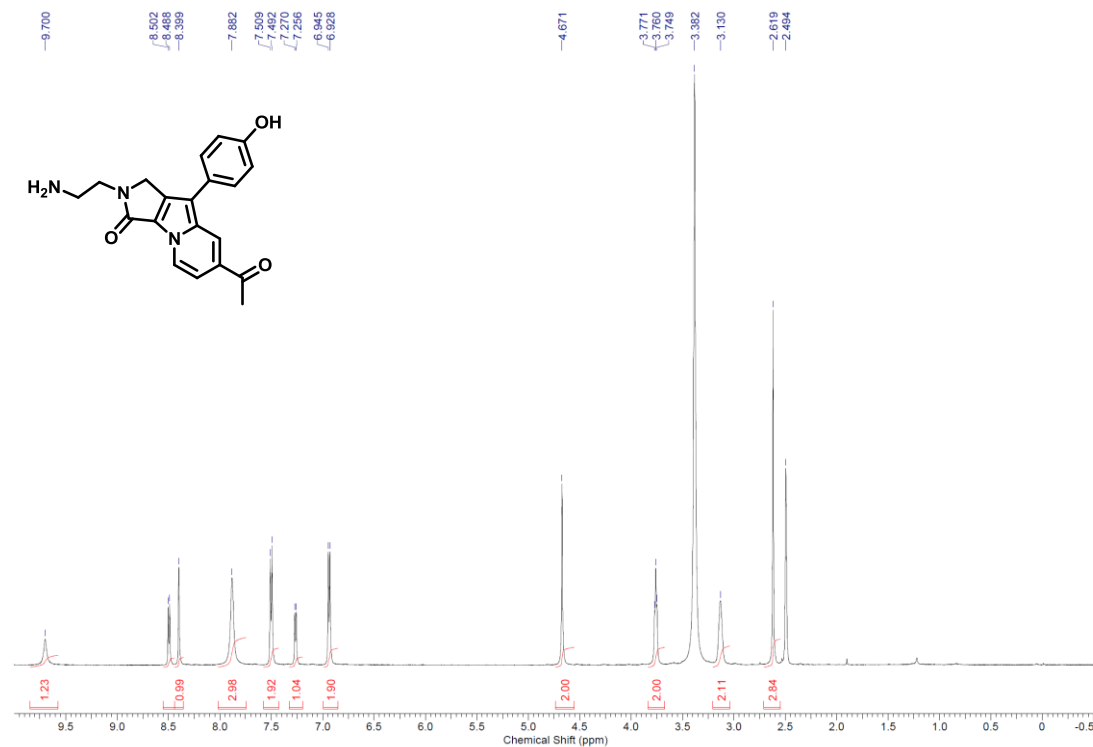

<sup>13</sup>C NMR (CDCl<sub>3</sub>)

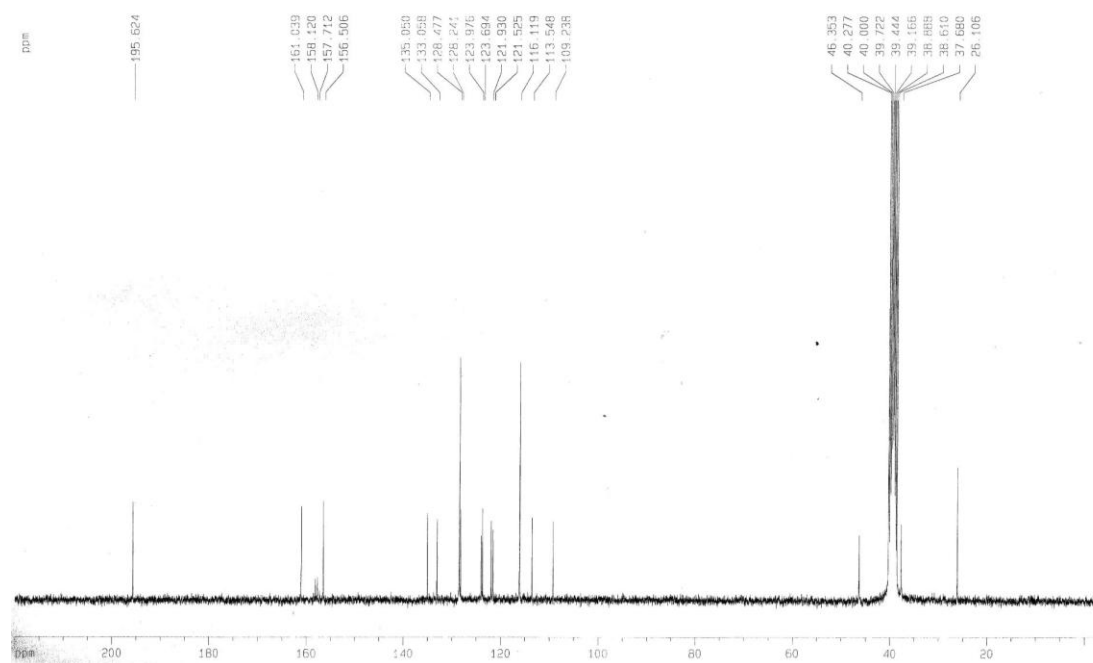

Supplement: c2cc31377d.pdf [file c2cc31377d.pdf]
